# Supplementary material
Source: publisher site journal article supplement (https://en-cdn.bio-protocol.org/attached/file/20191209/3454%20Supplement%20file.docx)
Supplement: Supplementary file 1 [file 3454%20Supplement%20file.docx]

**Supplement**

Macros

**Macro 1: Macro used to determine TH positive areas of images:**

input = getDirectory("");

output = getDirectory("");

suffix = ".tif";

processFolder(input);

function processFolder(input) {

list = getFileList(input);

for (i = 0; i < list.length; i++) {

if(File.isDirectory(input + list[i]))

processFolder("" + input + list[i]);

if(endsWith(list[i], suffix))

processFile(input, output, list[i]);

}

}

function processFile(input, output, file) {

print("Processing: " + input + file);

open(input + file);

run("8-bit");

setAutoThreshold("Otsu dark");

run("Convert to Mask");

run("Create Selection");

run("ROI Manager...");

roiManager("Add");

print("Saved to: " + output);

**}**

**Macro 2: Macro used to count double positive particles in images:**

input = getDirectory("");

output = getDirectory("");

suffix = ".tif";

processFolder(input);

function processFolder(input) {

list = getFileList(input);

for (i = 0; i < list.length; i++) {

if(File.isDirectory(input + list[i]))

processFolder("" + input + list[i]);

if(endsWith(list[i], suffix))

processFile(input, output, list[i]);

}

}

function processFile(input, output, file) {

print("Processing: " + input + file);

open(input + file);

roiManager("Select", i);

run("Copy");

run("Close");

newImage("Untitled", "RGB black", 1600, 1200, 1);

run("Paste");

run("8-bit");

setAutoThreshold("Default dark");

run("Convert to Mask");

run("Analyze Particles...", "size=23-Infinity display summarize");

print("Saved to: " + output);

}
